# Supplementary material
Source: publisher figshare collection journal article supplement (https://karger.figshare.com/articles/dataset/_/12528296)
Supplement: Supplementary file 1 [file 1]

# Uninvolved psoriatic skin

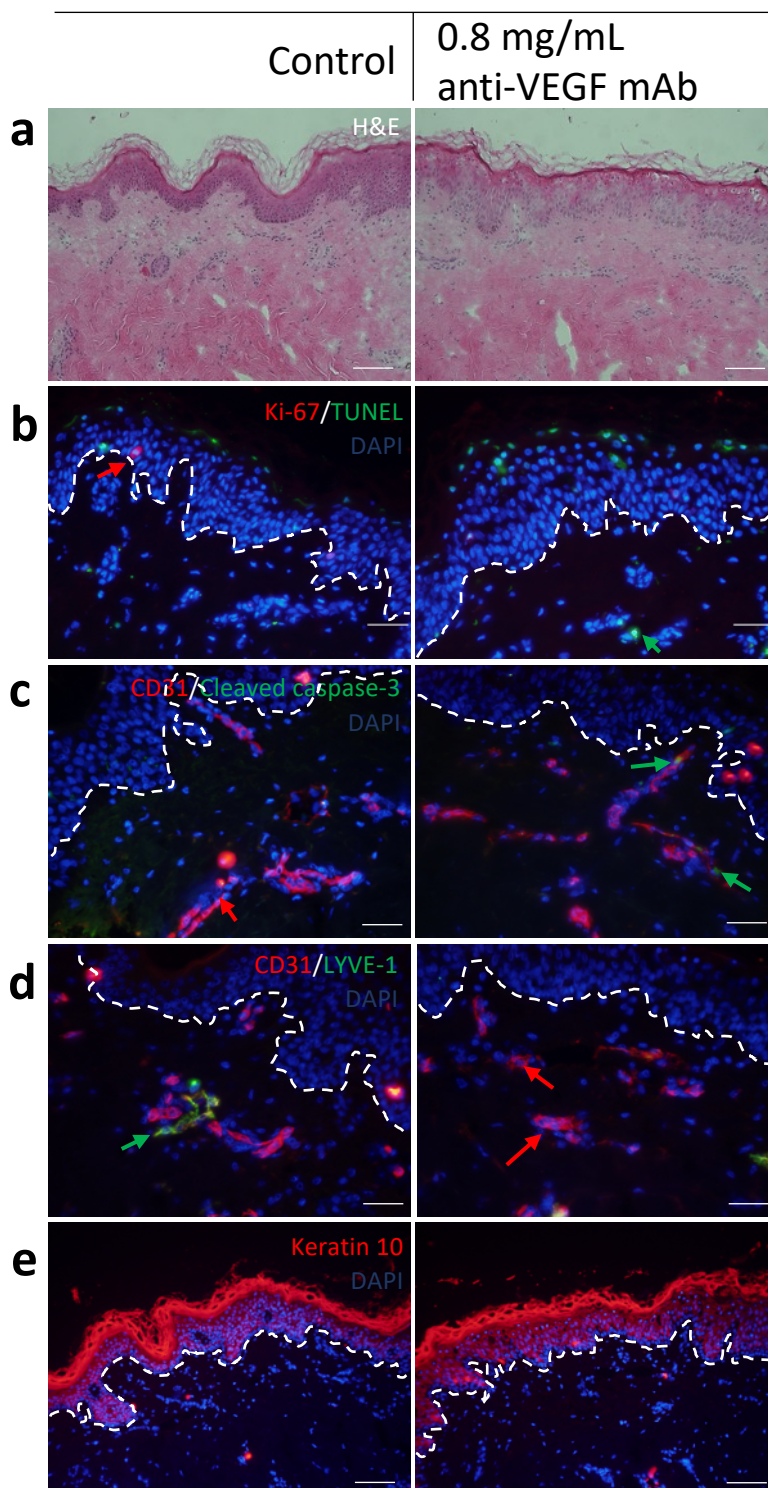

**Supplementary Figure S5. Representative images from uninvolved psoriatic skin incubated with 0.8 mg/mL of anti-VEGF mAb for 3 days. (a)** Haematoxylin and eosin stain. **(b)** Immunofluorescence staining of Ki-67 and TUNEL stain. The red arrows indicate Ki-67<sup>+</sup> cells and the green arrows indicate TUNEL<sup>+</sup> cells. **(c)** Immunofluorescence staining of CD31 and cleaved caspase-3. The red arrows indicate CD31<sup>+</sup> endothelial cells and green arrows indicate CD31<sup>+</sup> Cleaved caspase-3<sup>+</sup> endothelial cells. **(d)** Immunofluorescence staining of CD31 and LYVE-1. The red arrows indicate CD31<sup>+</sup> cells and green arrows indicate LYVE-1<sup>+</sup> endothelial cells. **(e)** Immunofluorescence staining of keratin 10. n=1 donor ( one punch biopsy per experimental condition).
