# Supplementary material
Source: publisher figshare collection journal article supplement (https://karger.figshare.com/articles/dataset/_/12528296)
Supplement: Supplementary file 2 [file 1]

**a**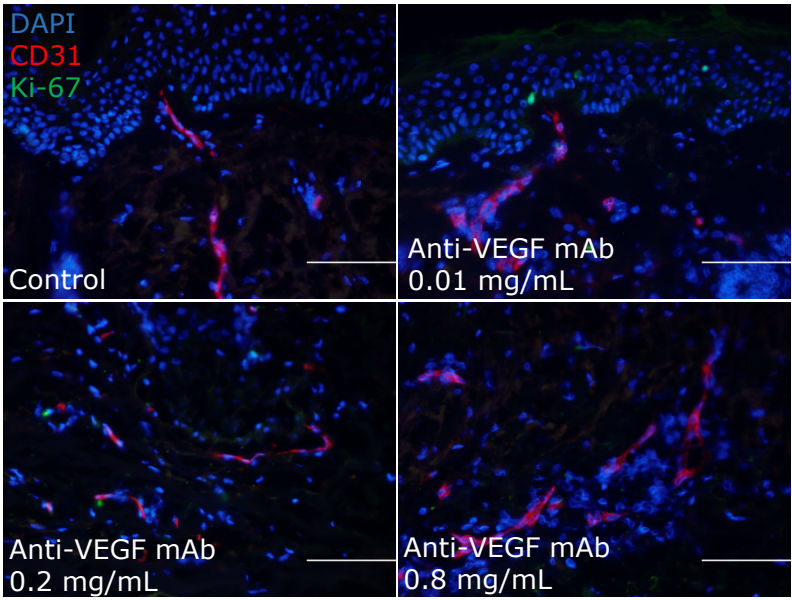**b**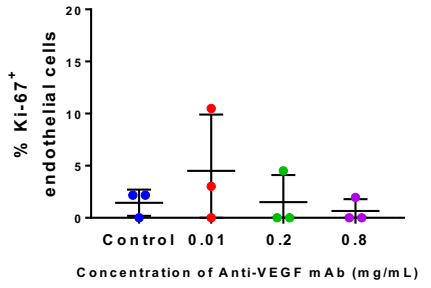

Supplementary Figure S1. CD31 and Ki-67 double staining showed that anti-VEGF mAb does not affect endothelial cell proliferation in skin organ culture. Number of independent experiments  $n=3$  (i.e., 1 punch per patient and per treatment group and at least 7 photomicrographs were analysed per condition). Scale bars = 100  $\mu$ m. Data were analysed with one-way ANOVA, mean  $\pm$  SD (Tukey's multiple comparison test).
