# Supplementary material
Source: publisher figshare collection journal article supplement (https://karger.figshare.com/articles/dataset/_/12528296)
Supplement: Supplementary file 3 [file 1]

**a**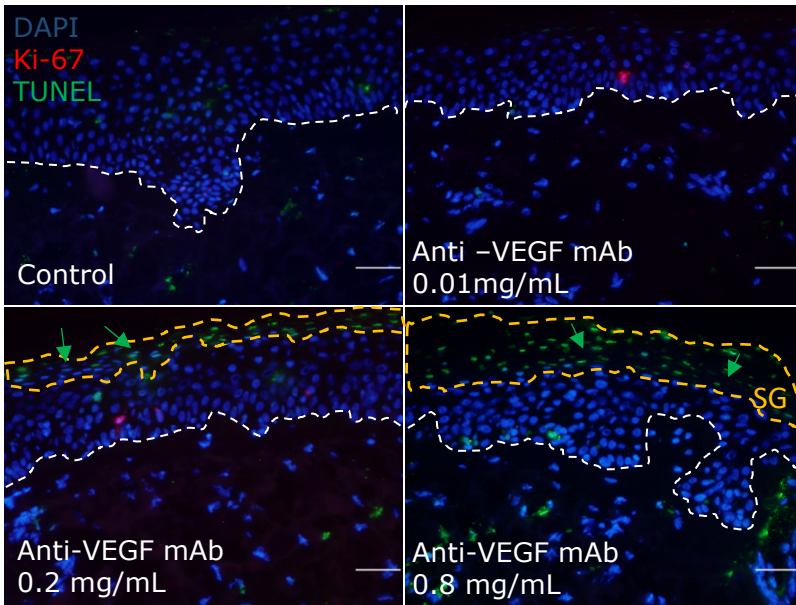**b**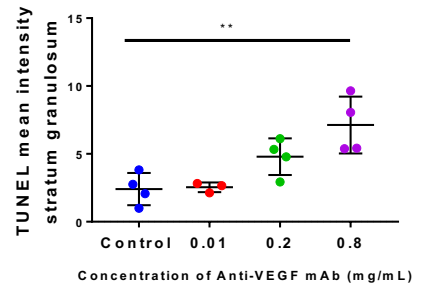

Supplementary Figure S2. Anti-VEGF mAb (concentration 0.8 mg/mL) increased TUNEL expression in the stratum granulosum (SG). Number of independent experiments  $n=4$  (i.e., 1 punch per patient and per treatment group and at least 7 photomicrographs were analysed per condition). Scale bars = 50  $\mu\text{m}$ . Data were analysed with one-way ANOVA, mean  $\pm$  SD (Tukey's multiple comparison test). \*\* $p<0.01$ .
