# Supplementary material
Source: publisher figshare collection journal article supplement (https://karger.figshare.com/articles/dataset/_/12528296)
Supplement: Supplementary file 4 [file 1]

Archive with 5 entries (5 files):
- SPP508344sm_1.pdf
- SPP508344sm_2.pdf
- SPP508344sm_3.pdf
- SPP508344sm_4.pdf
- SPP508344sm_5.pdf
