# Supplementary material
Source: publisher figshare collection journal article supplement (https://karger.figshare.com/articles/dataset/_/12528296)
Supplement: Supplementary file 4 [file 1 › SPP508344sm_3.pdf]

**a**

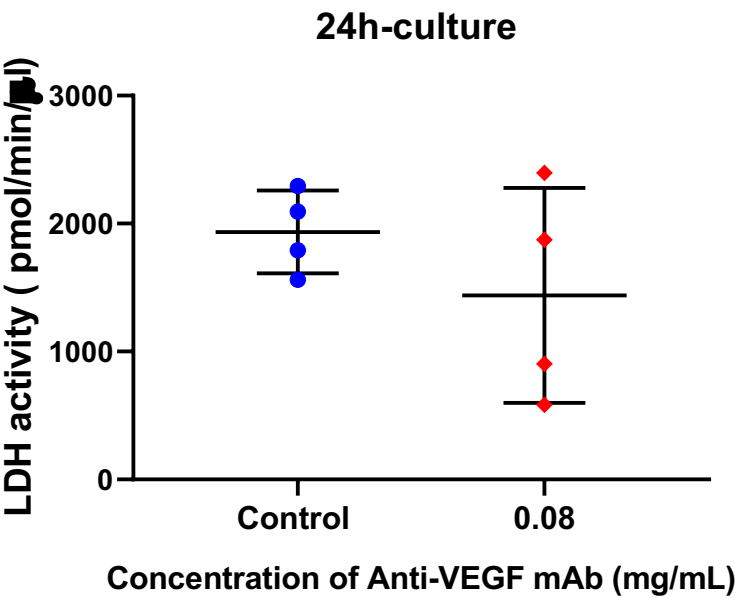

**b**

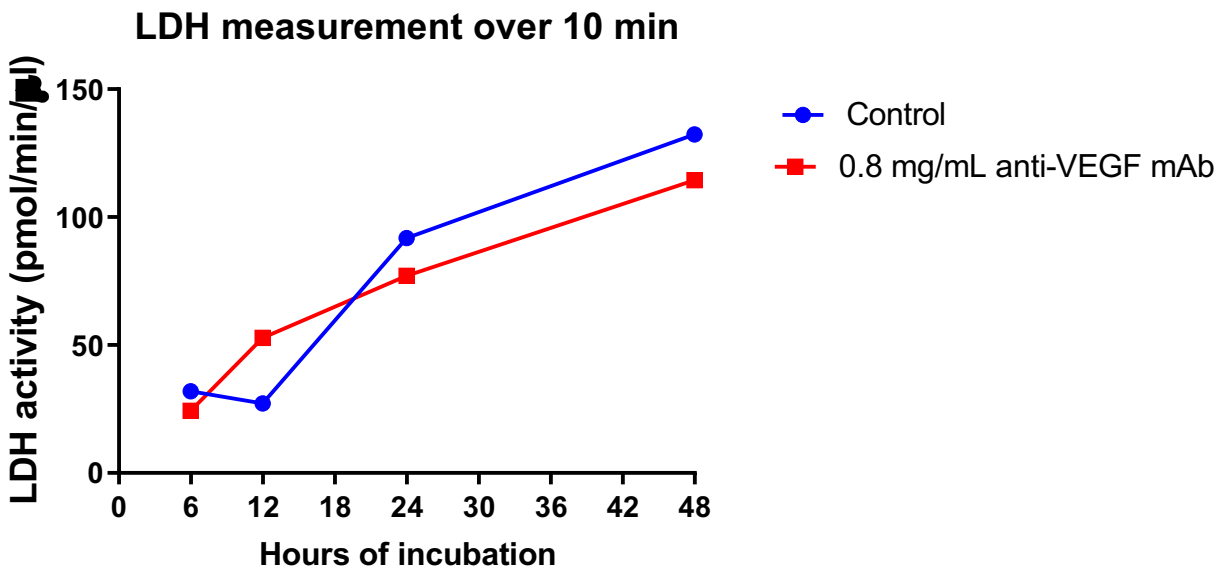

Supplementary Figure S3. Lactate dehydrogenase (LDH) activity was measured in organ culture supernatant of control and skin biopsies treated with 0.8 mg/mL of anti-VEGF mAb. **(a)** There were no differences in LDH activity between control and treated samples in the organ culture supernatant after 24 hours culture (n=4 different donors). Data were analysed with paired t test, mean  $\pm$  SD. **(b)** For one donor, LDH activity was measured at different time points (6,12,24 and 48 hours) over a 10-minute period of time.
