# Supplementary material
Source: publisher figshare collection journal article supplement (https://karger.figshare.com/articles/dataset/_/12528296)
Supplement: Supplementary file 4 [file 1 › SPP508344sm_4.pdf]

a

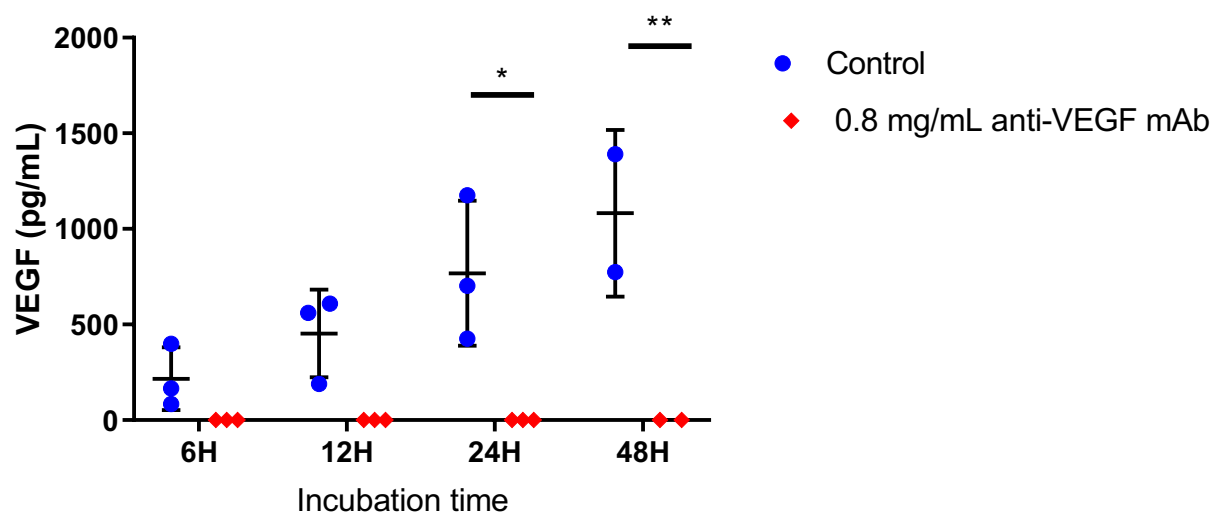

Supplementary Figure S4. The concentration of free VEGF was measured in organ culture supernatant of control and samples treated with anti-VEGF mAb (concentration 0.8 mg/mL) at 6, 12, 24 and 48 hours. Levels of free VEGF in culture supernatant of control samples increased with time. In contrast, free VEGF was undetectable in treated samples (n=3 for each group). Data were analysed with two-way ANOVA (Sidak's multiple comparisons test). \*p<0.05; \*\*p<0.01.
